# Supplementary material
Source: Springer Nature journal article supplement (https://www.springerprofessional.de/resource/supplementary/13638_2013_902_MOESM11_ESM.pdf/11899170)

| Original Image                                                                    | Received Image                                                                      | PSNR     |
|-----------------------------------------------------------------------------------|-------------------------------------------------------------------------------------|----------|
|    |    | 34.13 dB |
|   |   | 31.43 dB |
|  |  | 23.77 dB |

Supplement: MOESM11 [file 11899170]
